# Supplementary material for: Axitinib induces DNA damage response leading to senescence, mitotic catastrophe, and increased NK cell recognition in human renal carcinoma cells
Source: PubMed Central journal article supplement (PMC4742174; doi:10.18632/oncotarget.5768), 2015-10-14
Supplement: oncotarget-06-36245-s001.pdf [file oncotarget-06-36245-s001.pdf]

# Axitinib induces DNA damage response leading to senescence, mitotic catastrophe, and increased NK cell recognition in human renal carcinoma cells

## Supplementary Material

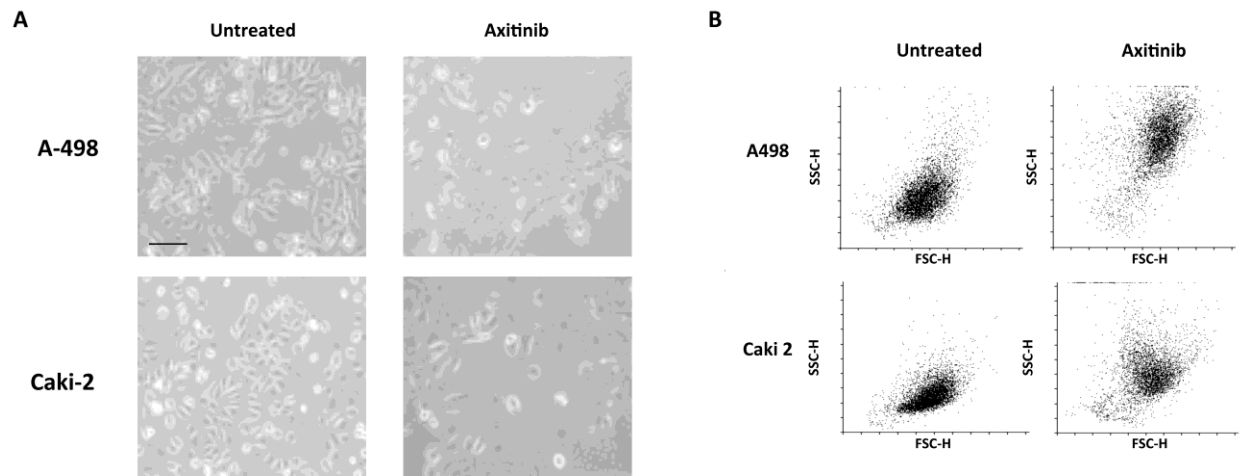

## Supplementary Fig. 1 Morphology of axitinib treated RCC cell lines

A) Morphological examination of axitinib treated RCC cells after 72 h. Bar: 100  $\mu$ M.

B) Representative forward-scatter (FSC) and side-scatter (SSC) dot plots after 72 h of treatment.

**Target: Caki-2**  
**E:T ratio 1:1**

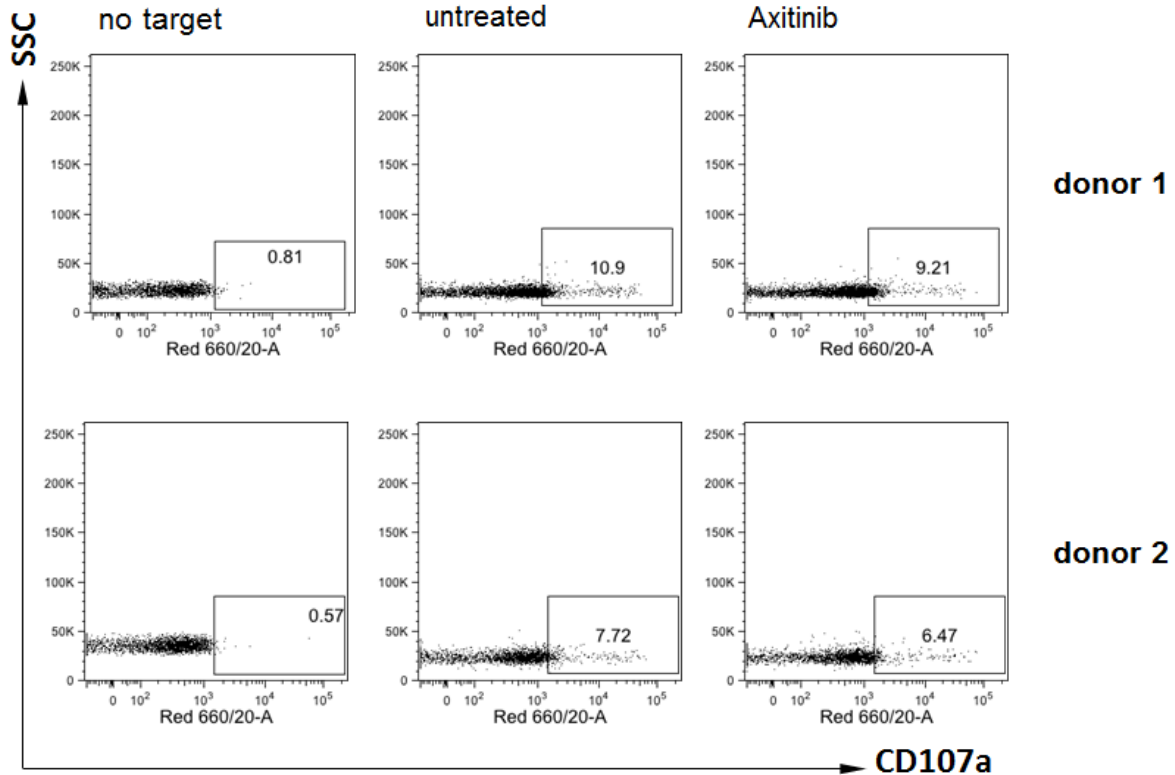

**Supplementary Fig. 2 Axitinib does not stimulate NK cell degranulation in Caki-2 RCC cells.**

Caki-2 RCC cells were treated with axitinib 25  $\mu$ M for 72 h and then incubated with freshly isolated human peripheral blood NK cells from two different healthy donors at 1:1 ratio for 2 h. Results are expressed as percentage of CD107a<sup>+</sup> NK cells.
